# Supplementary material for: High energy harvesting performance in flexible piezocomposites by synergistic design of the piezoelectric phase and conductive phase
Source: Royal Society of Chemistry journal article supplement (doi:10.1039/d2tc00914e), 2022-01-01
Supplement: d2tc00914e1.pdf [file d2tc00914e1.pdf]

## Supplementary materials

### High energy harvesting performance in flexible piezocomposites by synergistic design of piezoelectric phase and conductive phase

Jun Zhao, Mupeng Zheng\*, Xin Gao, Mankang Zhu, Yudong Hou

*Key Laboratory of Advanced Functional Materials, Ministry of Education, Faculty of  
Materials and Manufacturing, Beijing University of Technology, Beijing 100124, China*

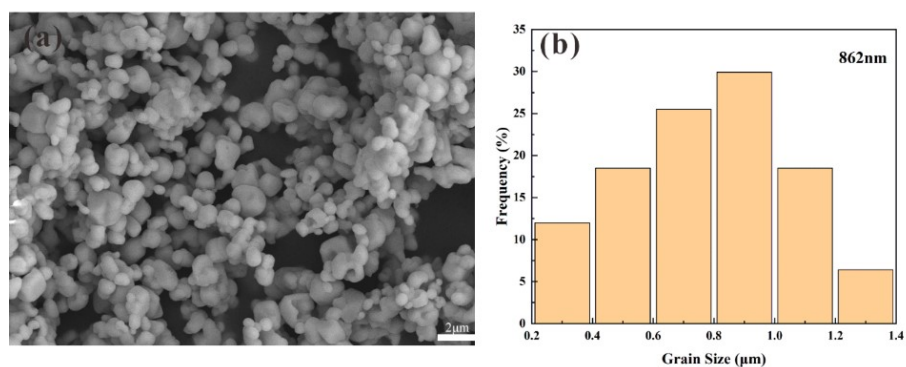

Figure S1. (a) SEM image and (b) average particle size of BCZT powders

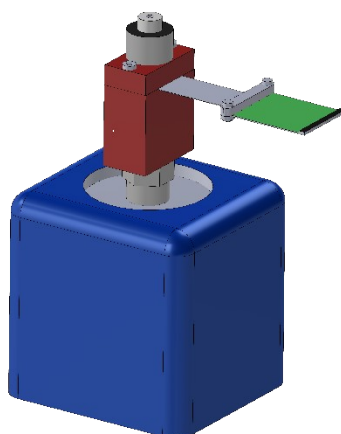

Figure S2. Device schematic of piezoelectric energy harvester with cantilever beam structure

---

\*Author to whom correspondence should be addressed. E-mail: [mpzheng@bjut.edu.cn](mailto:mpzheng@bjut.edu.cn).

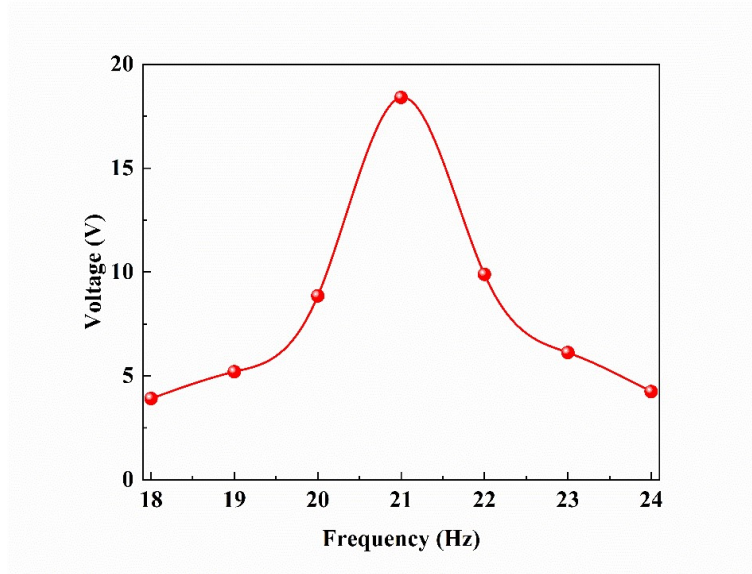

Figure S3. Relationship between open circuit voltage and vibration frequency of 5BCZT/0.1CNTs/PVDF FPEH.

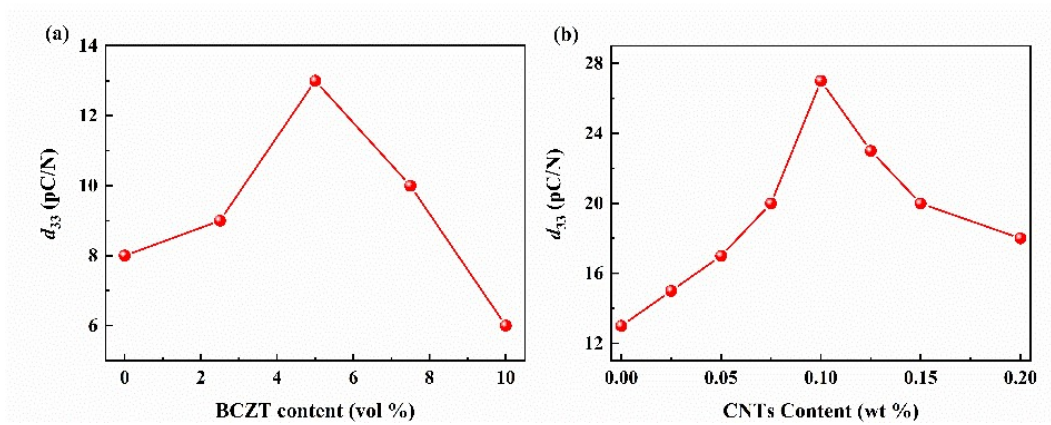

Figure S4.  $d_{33}$  of (a)  $x$ BCZT/PVDF and (b) 5BCZT/ $y$ CNTs/PVDF PCs.

Table S1. Fundamental parameters of materials setting in FEA.<sup>1,2</sup>

|      | Mechanical parameters        |                       | Piezoelectric parameters |              |
|------|------------------------------|-----------------------|--------------------------|--------------|
|      | Density (kg/m <sup>3</sup> ) | Young's modulus (kPa) | $d_{33}$ (pC/N)          | $\epsilon_r$ |
| PVDF | 1800                         | $5 \times 10^3$       | 10                       | 10           |
| BT   | 5700                         | -                     | 190                      | 1700         |
| CNTs | 1400                         | $1.8 \times 10^9$     | -                        | -            |

Table S2. Parameters of composites setting in FEA.

|                 | Length (mm) | Wide (mm) | Poling electric field (kV/mm) | Edge load (N/m <sup>2</sup> ) |
|-----------------|-------------|-----------|-------------------------------|-------------------------------|
| Piezocomposites | 50          | 20        | 20                            | 10000                         |

**Reference:**

1. M. M. J. Treacy, T. W. Ebbesen and J. M. Gibson, *Nature*, 1996, **381**, 678-680.
2. P. G. Collins and P. Avouris, *Sci. Am.*, 2000, **283**, 62-69.
